# Supplementary material
Source: PubMed Central journal article supplement (PMC8205719)
Supplement: ajtr0013-4464-f5.pdf [file ajtr0013-4464-f5.pdf]

## AGR2-KRT5 distinguishes lung cancer pathological subtypes

**Supplementary Table 1.** Information about datasets applied in this study

| Data Source | Type   | Platform       | pSCC | pADC |
|-------------|--------|----------------|------|------|
| GSE50081    | frozen | Affy. Plus 2.0 | 43   | 127  |
| GSE37745    | frozen | Affy. Plus 2.0 | 24   | 40   |
| GSE14814    | frozen | Affy. U133A    | 26   | 32   |
| GSE29016    | frozen | Illu. HT       | 13   | 37   |
| GSE42127    | frozen | Illu. WG       | 33   | 94   |
| Total       | frozen |                | 139  | 330  |
| GSE58661    | biopsy | Merck RSTA     | 36   | 42   |

Notes: frozen, frozen tissues; biopsy, small biopsy specimens; pADC, pathologically-determined ADC; pSCC, pathologically-determined SCC; Affy. Plus 2.0, Affymetrix Plus 2.0; Affy. U133A, Affymetrix U133A; Illu. WG, Illumina Human WG; Illu. HT, Illumina Human HT.

**Supplementary Table 2.** The protein expression of AGR2 and KRT5 evaluated by IHC for samples in training and validation sets

| No. | Sample set   | Pathological label | AGR2               |            | KRT5               |            |
|-----|--------------|--------------------|--------------------|------------|--------------------|------------|
|     |              |                    | expression results | IHC scores | expression results | IHC scores |
| 1   | Training set | ADC                | +                  | 4          | -                  | 1          |
| 2   | Training set | ADC                | +                  | 7          | -                  | 0          |
| 3   | Training set | ADC                | +                  | 4          | -                  | 0          |
| 4   | Training set | ADC                | +                  | 4          | -                  | 0          |
| 5   | Training set | ADC                | +                  | 7          | -                  | 2          |
| 6   | Training set | ADC                | +                  | 4          | -                  | 0          |
| 7   | Training set | ADC                | -                  | 1          | -                  | 0          |
| 8   | Training set | ADC                | +                  | 3          | -                  | 1          |
| 9   | Training set | ADC                | +                  | 3          | -                  | 0          |
| 10  | Training set | ADC                | +                  | 4          | -                  | 0          |
| 11  | Training set | ADC                | +                  | 3          | -                  | 0          |
| 12  | Training set | ADC                | +                  | 4          | -                  | 0          |
| 13  | Training set | ADC                | +                  | 4          | -                  | 1          |
| 14  | Training set | ADC                | +                  | 5          | -                  | 0          |
| 15  | Training set | ADC                | +                  | 3          | -                  | 0          |
| 16  | Training set | ADC                | +                  | 6          | -                  | 2          |
| 17  | Training set | ADC                | +                  | 4          | -                  | 0          |
| 18  | Training set | ADC                | +                  | 4          | -                  | 0          |
| 19  | Training set | ADC                | +                  | 5          | -                  | 0          |
| 20  | Training set | ADC                | +                  | 4          | -                  | 1          |
| 21  | Training set | ADC                | +                  | 4          | -                  | 0          |
| 22  | Training set | ADC                | +                  | 4          | -                  | 0          |
| 23  | Training set | ADC                | -                  | 0          | -                  | 0          |
| 24  | Training set | ADC                | +                  | 5          | -                  | 2          |
| 25  | Training set | ADC                | +                  | 4          | -                  | 0          |
| 26  | Training set | ADC                | +                  | 6          | -                  | 0          |
| 27  | Training set | ADC                | +                  | 4          | -                  | 0          |
| 28  | Training set | ADC                | +                  | 4          | -                  | 0          |
| 29  | Training set | ADC                | +                  | 6          | -                  | 0          |
| 30  | Training set | ADC                | +                  | 5          | -                  | 0          |

## AGR2-KRT5 distinguishes lung cancer pathological subtypes

|    |              |     |   |   |   |   |
|----|--------------|-----|---|---|---|---|
| 31 | Training set | ADC | + | 6 | - | 0 |
| 32 | Training set | ADC | + | 6 | - | 0 |
| 33 | Training set | ADC | + | 4 | - | 0 |
| 34 | Training set | ADC | + | 7 | - | 0 |
| 35 | Training set | ADC | + | 7 | - | 2 |
| 36 | Training set | ADC | + | 7 | - | 2 |
| 37 | Training set | ADC | + | 7 | - | 0 |
| 38 | Training set | ADC | - | 1 | - | 0 |
| 39 | Training set | ADC | + | 6 | - | 0 |
| 40 | Training set | ADC | - | 0 | - | 0 |
| 41 | Training set | ADC | + | 7 | - | 0 |
| 42 | Training set | ADC | + | 7 | - | 0 |
| 43 | Training set | ADC | + | 6 | - | 0 |
| 44 | Training set | ADC | + | 4 | - | 0 |
| 45 | Training set | ADC | + | 6 | - | 2 |
| 46 | Training set | ADC | + | 4 | - | 0 |
| 47 | Training set | ADC | + | 5 | - | 0 |
| 48 | Training set | ADC | + | 7 | - | 1 |
| 49 | Training set | ADC | + | 6 | - | 1 |
| 50 | Training set | ADC | + | 7 | - | 0 |
| 51 | Training set | ADC | + | 4 | - | 0 |
| 52 | Training set | ADC | + | 4 | - | 0 |
| 53 | Training set | ADC | + | 4 | - | 1 |
| 54 | Training set | ADC | + | 5 | - | 0 |
| 55 | Training set | ADC | + | 6 | - | 0 |
| 56 | Training set | ADC | + | 4 | - | 0 |
| 57 | Training set | ADC | + | 6 | - | 1 |
| 58 | Training set | ADC | + | 4 | - | 0 |
| 59 | Training set | ADC | + | 4 | - | 0 |
| 60 | Training set | ADC | + | 7 | + | 4 |
| 61 | Training set | ADC | + | 7 | - | 0 |
| 62 | Training set | ADC | + | 7 | - | 0 |
| 63 | Training set | ADC | + | 6 | - | 2 |
| 64 | Training set | ADC | + | 7 | - | 1 |
| 65 | Training set | ADC | + | 4 | - | 0 |
| 66 | Training set | ADC | + | 4 | - | 2 |
| 67 | Training set | ADC | + | 4 | - | 2 |
| 68 | Training set | ADC | + | 4 | - | 0 |
| 69 | Training set | ADC | + | 6 | - | 0 |
| 70 | Training set | ADC | + | 4 | - | 1 |
| 71 | Training set | ADC | + | 4 | - | 0 |
| 72 | Training set | ADC | + | 3 | - | 0 |
| 73 | Training set | ADC | + | 4 | - | 0 |
| 74 | Training set | ADC | + | 6 | - | 0 |
| 75 | Training set | ADC | + | 5 | - | 0 |
| 76 | Training set | ADC | + | 4 | - | 0 |
| 77 | Training set | ADC | - | 2 | - | 0 |
| 78 | Training set | ADC | + | 4 | - | 0 |
| 79 | Training set | ADC | + | 5 | - | 0 |
| 80 | Training set | ADC | + | 4 | - | 0 |

## AGR2-KRT5 distinguishes lung cancer pathological subtypes

|     |              |     |   |   |   |   |
|-----|--------------|-----|---|---|---|---|
| 81  | Training set | ADC | + | 3 | - | 0 |
| 82  | Training set | ADC | + | 6 | - | 1 |
| 83  | Training set | ADC | + | 7 | - | 0 |
| 84  | Training set | ADC | + | 6 | - | 0 |
| 85  | Training set | ADC | + | 3 | - | 1 |
| 86  | Training set | ADC | + | 7 | - | 0 |
| 87  | Training set | ADC | + | 4 | - | 0 |
| 88  | Training set | ADC | + | 5 | - | 1 |
| 89  | Training set | ADC | + | 4 | - | 0 |
| 90  | Training set | SCC | - | 0 | + | 7 |
| 91  | Training set | SCC | - | 0 | + | 5 |
| 92  | Training set | SCC | - | 1 | + | 5 |
| 93  | Training set | SCC | - | 0 | + | 7 |
| 94  | Training set | SCC | - | 0 | + | 7 |
| 95  | Training set | SCC | - | 0 | + | 6 |
| 96  | Training set | SCC | - | 1 | + | 4 |
| 97  | Training set | SCC | - | 0 | + | 7 |
| 98  | Training set | SCC | - | 1 | - | 1 |
| 99  | Training set | SCC | - | 0 | - | 1 |
| 100 | Training set | SCC | - | 0 | - | 0 |
| 101 | Training set | SCC | - | 0 | + | 7 |
| 102 | Training set | SCC | - | 0 | + | 7 |
| 103 | Training set | SCC | - | 1 | + | 7 |
| 104 | Training set | SCC | - | 0 | + | 6 |
| 105 | Training set | SCC | - | 0 | + | 7 |
| 106 | Training set | SCC | - | 0 | + | 7 |
| 107 | Training set | SCC | - | 0 | + | 3 |
| 108 | Training set | SCC | - | 0 | + | 5 |
| 109 | Training set | SCC | - | 0 | + | 6 |
| 110 | Training set | SCC | + | 3 | - | 2 |
| 111 | Training set | SCC | - | 0 | + | 6 |
| 112 | Training set | SCC | - | 0 | + | 6 |
| 113 | Training set | SCC | - | 0 | + | 6 |
| 114 | Training set | SCC | - | 0 | + | 7 |
| 115 | Training set | SCC | - | 1 | + | 7 |
| 116 | Training set | SCC | - | 0 | + | 3 |
| 117 | Training set | SCC | - | 1 | + | 6 |
| 118 | Training set | SCC | - | 0 | + | 7 |
| 119 | Training set | SCC | - | 0 | + | 7 |
| 120 | Training set | SCC | - | 1 | - | 2 |
| 121 | Training set | SCC | - | 0 | + | 6 |
| 122 | Training set | SCC | - | 0 | + | 5 |
| 123 | Training set | SCC | - | 0 | + | 5 |
| 124 | Training set | SCC | - | 1 | + | 5 |
| 125 | Training set | SCC | - | 0 | + | 6 |
| 126 | Training set | SCC | - | 2 | + | 5 |
| 127 | Training set | SCC | - | 0 | + | 6 |
| 128 | Training set | SCC | - | 0 | + | 5 |
| 129 | Training set | SCC | - | 0 | + | 3 |
| 130 | Training set | SCC | - | 0 | + | 3 |

## AGR2-KRT5 distinguishes lung cancer pathological subtypes

|     |              |     |   |   |   |   |
|-----|--------------|-----|---|---|---|---|
| 131 | Training set | SCC | - | 2 | + | 7 |
| 132 | Training set | SCC | - | 2 | + | 5 |
| 133 | Training set | SCC | - | 0 | + | 6 |
| 134 | Training set | SCC | - | 0 | + | 5 |
| 135 | Training set | SCC | - | 0 | + | 7 |
| 136 | Training set | SCC | - | 1 | + | 7 |
| 137 | Training set | SCC | - | 0 | + | 6 |
| 138 | Training set | SCC | - | 0 | + | 7 |
| 139 | Training set | SCC | - | 1 | + | 7 |
| 140 | Training set | SCC | - | 0 | + | 6 |
| 141 | Training set | SCC | - | 2 | + | 5 |
| 142 | Training set | SCC | - | 0 | + | 6 |
| 143 | Training set | SCC | - | 0 | + | 3 |
| 144 | Training set | SCC | - | 0 | + | 6 |
| 145 | Training set | SCC | - | 0 | + | 6 |
| 146 | Training set | SCC | - | 0 | + | 3 |
| 147 | Training set | SCC | - | 0 | + | 4 |
| 148 | Training set | SCC | - | 2 | + | 7 |
| 149 | Training set | SCC | - | 0 | + | 7 |
| 150 | Training set | SCC | - | 2 | + | 6 |
| 151 | Training set | SCC | - | 0 | + | 6 |
| 152 | Training set | SCC | - | 0 | + | 3 |
| 153 | Training set | SCC | - | 0 | - | 2 |
| 154 | Training set | SCC | - | 0 | + | 7 |
| 155 | Training set | SCC | - | 0 | + | 6 |
| 156 | Training set | SCC | - | 0 | + | 7 |
| 157 | Training set | SCC | - | 1 | + | 7 |
| 158 | Training set | SCC | - | 0 | + | 5 |
| 159 | Training set | SCC | - | 1 | + | 5 |
| 160 | Training set | SCC | - | 0 | + | 4 |
| 161 | Training set | SCC | - | 0 | + | 3 |
| 162 | Training set | SCC | - | 0 | + | 3 |
| 163 | Training set | SCC | - | 0 | + | 7 |
| 164 | Training set | SCC | - | 0 | + | 6 |
| 165 | Training set | SCC | - | 0 | + | 6 |
| 166 | Training set | SCC | - | 0 | + | 7 |
| 167 | Training set | SCC | + | 3 | + | 7 |
| 168 | Training set | SCC | - | 0 | + | 3 |
| 169 | Training set | SCC | - | 0 | + | 4 |
| 170 | Training set | SCC | - | 0 | + | 4 |
| 171 | Training set | SCC | - | 0 | + | 6 |
| 172 | Training set | SCC | - | 0 | + | 7 |
| 173 | Training set | SCC | - | 0 | + | 5 |
| 174 | Training set | SCC | - | 0 | + | 5 |
| 175 | Training set | SCC | - | 0 | + | 3 |
| 176 | Training set | SCC | - | 2 | + | 5 |
| 177 | Training set | SCC | - | 0 | + | 4 |
| 178 | Training set | SCC | - | 0 | + | 7 |
| 179 | Training set | SCC | - | 0 | + | 4 |
| 180 | Training set | SCC | + | 4 | + | 4 |

## AGR2-KRT5 distinguishes lung cancer pathological subtypes

|     |                |     |   |   |   |   |
|-----|----------------|-----|---|---|---|---|
| 181 | Training set   | SCC | - | 0 | + | 3 |
| 182 | Training set   | SCC | - | 0 | + | 5 |
| 183 | Training set   | SCC | - | 0 | + | 6 |
| 184 | Training set   | SCC | - | 2 | + | 7 |
| 185 | Training set   | SCC | - | 0 | + | 6 |
| 186 | Training set   | SCC | - | 0 | + | 4 |
| 187 | Training set   | SCC | - | 1 | + | 4 |
| 188 | Training set   | SCC | - | 1 | + | 7 |
| 189 | Validation set | ADC | + | 4 | - | 0 |
| 190 | Validation set | SCC | - | 0 | + | 4 |
| 191 | Validation set | SCC | - | 0 | + | 6 |
| 192 | Validation set | ADC | + | 3 | - | 0 |
| 193 | Validation set | ADC | + | 5 | - | 0 |
| 194 | Validation set | SCC | - | 1 | + | 7 |
| 195 | Validation set | ADC | + | 3 | - | 0 |
| 196 | Validation set | SCC | - | 0 | + | 4 |
| 197 | Validation set | SCC | - | 0 | + | 3 |
| 198 | Validation set | SCC | - | 0 | - | 1 |
| 199 | Validation set | ADC | + | 5 | - | 0 |
| 200 | Validation set | SCC | - | 1 | + | 4 |
| 201 | Validation set | SCC | + | 3 | + | 4 |
| 202 | Validation set | ADC | + | 6 | - | 0 |
| 203 | Validation set | SCC | - | 0 | + | 4 |
| 204 | Validation set | ADC | + | 4 | - | 0 |
| 205 | Validation set | SCC | - | 2 | + | 7 |
| 206 | Validation set | SCC | - | 2 | + | 6 |
| 207 | Validation set | SCC | - | 2 | + | 4 |
| 208 | Validation set | SCC | - | 0 | + | 3 |
| 209 | Validation set | ADC | + | 5 | - | 0 |
| 210 | Validation set | SCC | - | 0 | + | 5 |
| 211 | Validation set | ADC | + | 7 | - | 0 |
| 212 | Validation set | SCC | - | 0 | + | 5 |
| 213 | Validation set | SCC | - | 2 | + | 3 |
| 214 | Validation set | ADC | + | 6 | - | 0 |
| 215 | Validation set | SCC | - | 0 | + | 3 |
| 216 | Validation set | SCC | - | 0 | + | 4 |
| 217 | Validation set | SCC | - | 1 | + | 6 |
| 218 | Validation set | SCC | - | 2 | + | 4 |
| 219 | Validation set | SCC | - | 0 | - | 2 |
| 220 | Validation set | SCC | - | 1 | + | 4 |
| 221 | Validation set | SCC | - | 0 | + | 4 |
| 222 | Validation set | ADC | + | 5 | - | 0 |
| 223 | Validation set | SCC | - | 2 | + | 4 |
| 224 | Validation set | SCC | - | 2 | + | 3 |
| 225 | Validation set | SCC | - | 1 | + | 3 |
| 226 | Validation set | ADC | + | 5 | - | 0 |
| 227 | Validation set | SCC | - | 0 | + | 3 |
| 228 | Validation set | SCC | - | 2 | + | 6 |
| 229 | Validation set | SCC | + | 3 | + | 4 |
| 230 | Validation set | SCC | - | 0 | + | 4 |

## AGR2-KRT5 distinguishes lung cancer pathological subtypes

**Supplementary Table 3.** Sensitivity, specificity, PPV and NPV of IHC markers in the training set (%)

| Markers | Sensitivity   | Specificity   | PPV           | NPV            |
|---------|---------------|---------------|---------------|----------------|
| AGR2    | 94.4% (84/89) | 97.0% (96/99) | 97.7% (84/87) | 95.1% (96/101) |
| KRT5    | 93.9% (93/99) | 98.9% (88/89) | 98.9% (93/94) | 93.6% (88/94)  |

Notes: In this table, we took IHC staining score 3 as the cutoff value. Sensitivity = TP/TP+FN; Specificity = TN/TN+FP; Positive predictive value (PPV) = TP/TP+FP; Negative predictive value (NPV) = TN/TN+FN. FN indicates false negatives; FP, false positives; TN, true negatives; TP, true positives.

**Supplementary Table 4.** The comparison of two IHC marker combinations in the validation set

| AGR2-KRT5                | TTF1-P40                 |                        | Total |
|--------------------------|--------------------------|------------------------|-------|
|                          | no. of correct diagnosis | no. of false diagnosis |       |
| no. of correct diagnosis | 37                       | 1                      | 38    |
| no. of false diagnosis   | 1                        | 3                      | 4     |
| Total                    | 38                       | 4                      | 42    |

**Supplementary Table 5.** Associations between marker mRNA expression and clinicopathological parameters in GSE50081

| Variable               | No. of cases | AGR2            |                 | P      | KRT5            |                 | P      |
|------------------------|--------------|-----------------|-----------------|--------|-----------------|-----------------|--------|
|                        |              | No. of pos. (%) | No. of neg. (%) |        | No. of pos. (%) | No. of neg. (%) |        |
| <b>Patient age</b>     |              |                 |                 |        |                 |                 |        |
| <60 years              | 25           | 8 (32.00%)      | 17 (68.00%)     | 0.082  | 10 (40.00%)     | 15 (60.00%)     | 0.387  |
| ≥60 years              | 145          | 77 (53.10%)     | 68 (46.90%)     |        | 75 (51.72%)     | 70 (48.28%)     |        |
| <b>Gender</b>          |              |                 |                 |        |                 |                 |        |
| Male                   | 90           | 51 (56.67%)     | 39 (43.33%)     | 0.091  | 44 (48.89%)     | 46 (51.11%)     | 0.878  |
| Female                 | 80           | 34 (42.50%)     | 46 (57.50%)     |        | 41 (51.25%)     | 39 (48.75%)     |        |
| <b>Smoking history</b> |              |                 |                 |        |                 |                 |        |
| Yes                    | 126          | 64 (50.79%)     | 62 (49.21%)     | 0.967  | 65 (51.59%)     | 61 (48.41%)     | 0.791  |
| No                     | 24           | 11 (45.83%)     | 13 (54.17%)     |        | 11 (45.83%)     | 13 (54.17%)     |        |
| Unable to determine    | 20           | 10 (50.00%)     | 10 (50.00%)     |        | 9 (45.00%)      | 11 (55.00%)     |        |
| <b>Histology</b>       |              |                 |                 |        |                 |                 |        |
| ADC                    | 127          | 74 (58.27%)     | 53 (41.73%)     | <0.001 | 46 (36.22%)     | 81 (63.78%)     | <0.001 |
| SCC                    | 43           | 11 (25.58%)     | 32 (74.42%)     |        | 39 (90.70%)     | 9.30%           |        |
| <b>pT-status</b>       |              |                 |                 |        |                 |                 |        |
| pT1-2                  | 168          | 85 (50.60%)     | 83 (49.40%)     | 0.497  | 85 (50.60%)     | 83 (49.40%)     | 0.497  |
| pT3-4                  | 2            | 0               | 2 (100%)        |        | 0               | 2 (100%)        |        |
| <b>pN-status</b>       |              |                 |                 |        |                 |                 |        |
| pN0-1                  | 170          | 85 (50.00%)     | 85 (50.00%)     | 1      | 85 (50.00%)     | 85 (50.00%)     | 1      |
| pN2-3                  | 0            | 0               | 0               |        | 0               | 0               |        |
| <b>TNM stage</b>       |              |                 |                 |        |                 |                 |        |
| I-II                   | 170          | 85 (50.00%)     | 85 (50.00%)     | 1      | 85 (50.00%)     | 85 (50.00%)     | 1      |
| III-IV                 | 0            | 0               | 0               |        | 0               | 0               |        |

# AGR2-KRT5 distinguishes lung cancer pathological subtypes

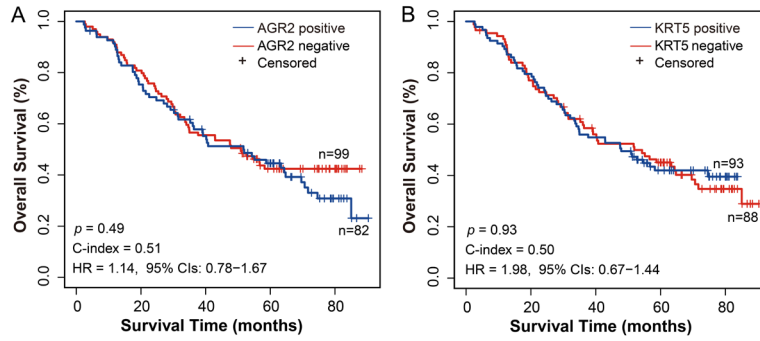

**Supplementary Figure 1.** Survival curves of training set based on AGR2 and KRT5 protein expression. Survival curves of positive and negative expressions for AGR2 (A) and KRT5 (B).

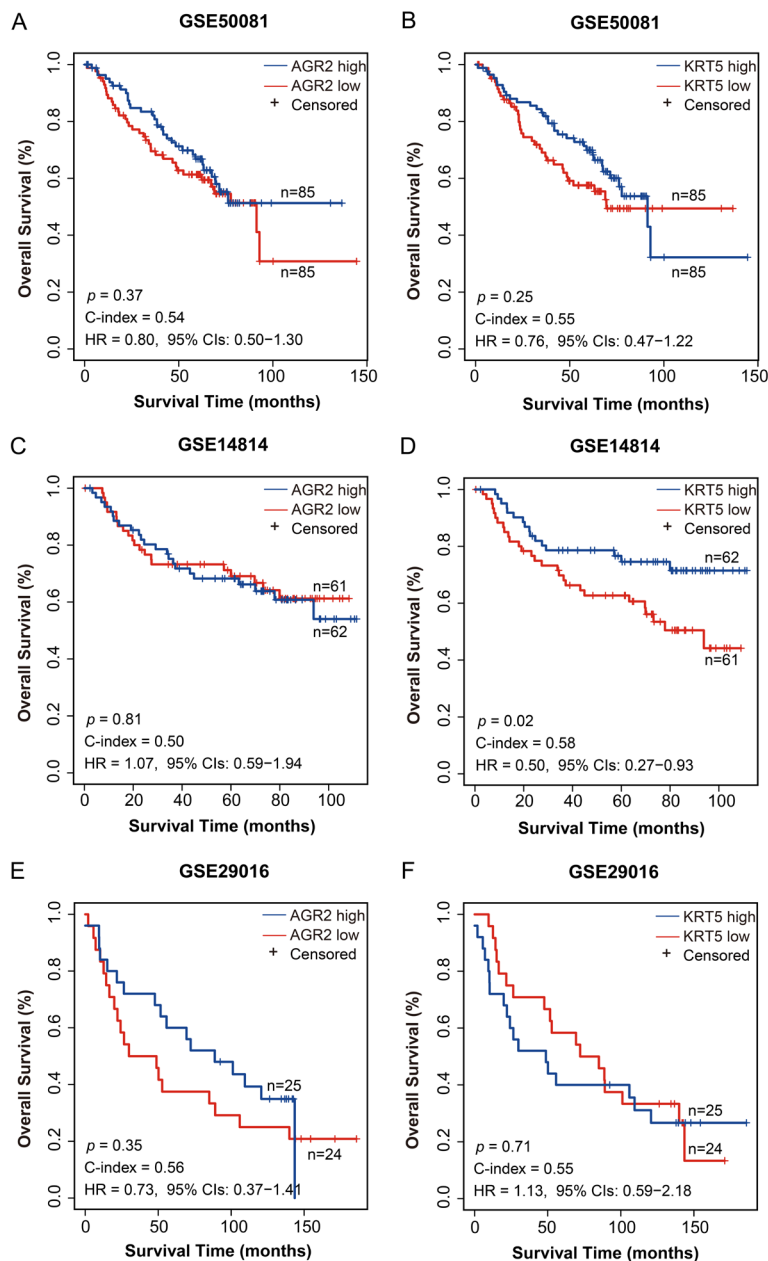

## AGR2-KRT5 distinguishes lung cancer pathological subtypes

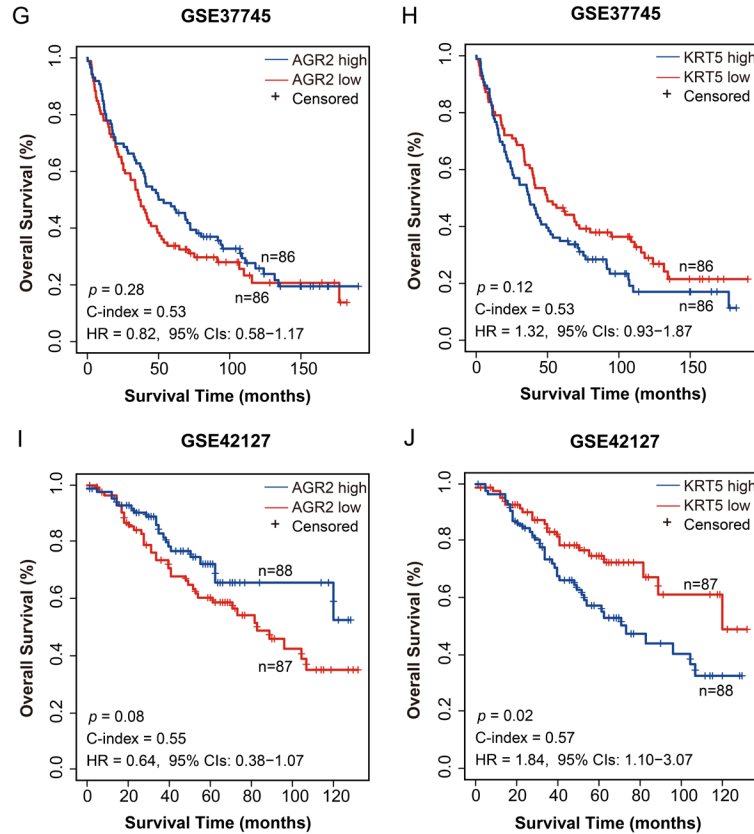

**Supplementary Figure 2.** Survival curves of patients with expression of AGR2 and KRT5 in GEO datasets. Survival curves of overall survival (OS) accordingly for the high and low AGR2 expression groups in GSE50081 (A), GSE14814 (C), GSE29016 (E), GSE37745 (G) and GSE42127 (I). Survival curves of OS respectively for the diverse expression groups of KRT5 in GSE50081 (B), GSE14814 (D), GSE29016 (F), GSE37745 (H) and GSE42127 (J). The high and low expression groups of marker genes were categorized according to the median of the gene expression.
